# Supplementary material
Source: PubMed Central journal article supplement (PMC2931535)
Supplement: supp_003210_003210TableS1.pdf [file supp_003210_003210TableS1.pdf]

**Table S1. Co-expression of Rgs16::GFP with markers of endocrine cell types during pancreatic development.**

|                      | <b>E8.5</b>                                                        | <b>E9.5</b>                                                        | <b>E10.5</b>                                                        | <b>E15.5</b>                                                           |
|----------------------|--------------------------------------------------------------------|--------------------------------------------------------------------|---------------------------------------------------------------------|------------------------------------------------------------------------|
| <b>E-cadherin</b>    | -                                                                  | -                                                                  | -                                                                   | <b>3.5%</b><br>589 Rgs16 <sup>+</sup> ;<br>21 also E-cad <sup>+</sup>  |
| <b>Sox9</b>          | <b>90%</b><br>69 Rgs16 <sup>+</sup> ;<br>62 also Sox9 <sup>+</sup> | <b>58%</b><br>98 Rgs16 <sup>+</sup> ;<br>57 also Sox9 <sup>+</sup> | <b>11%</b><br>145 Rgs16 <sup>+</sup> ;<br>16 also Sox9 <sup>+</sup> | <b>5%</b><br>391 Rgs16 <sup>+</sup> ;<br>18 also Sox9 <sup>+</sup>     |
| <b>Pdx1</b>          | -                                                                  | -                                                                  | -                                                                   | <b>53%</b><br>596 Rgs16 <sup>+</sup> ;<br>314 also Pdx1 <sup>+</sup>   |
| <b>Ngn3</b>          | -                                                                  | -                                                                  | -                                                                   | <b>0%</b><br>469 Rgs16 <sup>+</sup> ;<br>0 also Ngn3 <sup>+</sup>      |
| <b>Nkx6.1</b>        | -                                                                  | -                                                                  | -                                                                   | <b>52%</b><br>418 Rgs16 <sup>+</sup> ;<br>219 also Nkx6.1 <sup>+</sup> |
| <b>Synaptophysin</b> | -                                                                  | -                                                                  | -                                                                   | <b>97%</b><br>387 Rgs16 <sup>+</sup> ;<br>375 also Synap <sup>+</sup>  |
| <b>Glucagon</b>      | -                                                                  | -                                                                  | -                                                                   | <b>41%</b><br>119 Rgs16 <sup>+</sup> ;<br>49 also Glu <sup>+</sup>     |
| <b>Insulin</b>       | -                                                                  | -                                                                  | -                                                                   | <b>52%</b><br>473 Rgs16 <sup>+</sup> ;<br>246 also Ins <sup>+</sup>    |
| <b>Ki67</b>          | -                                                                  | -                                                                  | -                                                                   | <b>1.45%</b><br>2238 Rgs16 <sup>+</sup> ;<br>33 also Ki67 <sup>+</sup> |

Percentage co-expression of Rgs16::GFP with other endocrine markers, as a function of the total number of Rgs16::GFP<sup>+</sup> cells.
