# Supplementary material
Source: PubMed Central journal article supplement (PMC2931535)
Supplement: supp_003210_003210TableS2.pdf [file supp_003210_003210TableS2.pdf]

**Table S2. Co-expression of Rgs16::GFP with BrdU during islet regeneration in PANIC-ATTAC mice.**

|              | Uninduced/Normoglycemic                                                                                                                            |                   | Hyperglycemic                                                                                                                                                                                    |                   |
|--------------|----------------------------------------------------------------------------------------------------------------------------------------------------|-------------------|--------------------------------------------------------------------------------------------------------------------------------------------------------------------------------------------------|-------------------|
|              | Rgs16 <sup>+</sup>                                                                                                                                 | BrdU <sup>+</sup> | Rgs16 <sup>+</sup>                                                                                                                                                                               | BrdU <sup>+</sup> |
| <b>PANIC</b> | NA%<br>islet cells counted: 1024<br>Rgs16 <sup>+</sup> : 0                      BrdU <sup>+</sup> : 1<br>Rgs16 <sup>+</sup> /BrdU <sup>+</sup> : 0 |                   | Rgs16 <sup>+</sup> cell proliferation rate: 5.6%<br>islet cells counted: 765<br>Rgs16 <sup>+</sup> : 53                      BrdU <sup>+</sup> : 10<br>Rgs16 <sup>+</sup> /BrdU <sup>+</sup> : 3 |                   |

Percentage of Rgs16::GFP that also incorporate BrdU during islet endocrine cell regeneration.
