# Supplementary material
Source: PubMed Central journal article supplement (PMC2931535)
Supplement: supp_003210_003210TableS3.pdf [file supp_003210_003210TableS3.pdf]

**Table S3. Co-expression of Rgs16::GFP with Ki67 during islet expansion in *ob/ob* mice.**

| Normoglycemic WT                          |                       | Hyperglycemic <i>ob/ob</i>                |                         |
|-------------------------------------------|-----------------------|-------------------------------------------|-------------------------|
| Rgs16 <sup>+</sup>                        | Ki67 <sup>+</sup>     | Rgs16 <sup>+</sup>                        | Ki67 <sup>+</sup>       |
| islet cells counted: 604                  |                       | islet cells counted: 13,011               |                         |
| Rgs16 <sup>+</sup> : 0                    | Ki67 <sup>+</sup> : 0 | Rgs16 <sup>+</sup> : 452                  | Ki67 <sup>+</sup> : 229 |
| Rgs16 <sup>+</sup> /Ki67 <sup>+</sup> : 0 |                       | Rgs16 <sup>+</sup> /Ki67 <sup>+</sup> : 7 |                         |

Percentage of Rgs16::GFP<sup>+</sup> cells that also incorporate Ki67 during islet endocrine cell expansion/proliferation.
